# Supplementary material for: A PW12/Ag functionalized mesoporous silica-coated magnetic Fe3O4 core–shell composite as an efficient and recyclable photocatalyst
Source: Royal Society of Chemistry journal article supplement (doi:10.1039/d0dt03882b), 2020-12-10
Supplement: d0dt03882b1.pdf [file d0dt03882b1.pdf]

## *Supporting Information*

### **POM/Ag functionalized mesoporous silica coated magnetic Fe<sub>3</sub>O<sub>4</sub> core-shell composite as efficiency and recyclable photocatalyst**

Pan-Feng Wu,<sup>\*a,b</sup> QiXue,<sup>c</sup> Tian-Yu Wang,<sup>b</sup> Shan-jianLi,<sup>a</sup> Gao-Peng Li,<sup>\*d</sup> and Gang-Lin Xue<sup>\*b</sup>

<sup>a</sup> School of Chemistry and Chemical Engineering, Xi'an Shiyou University, 18 Dianzi Road, Yanta District, Xi'an, 710065, P. R. China. E-mail: wupf801@163.com

<sup>b</sup> Key Laboratory of Synthetic and Natural Functional Molecule Chemistry of the Ministry of Education, Shaanxi Key Laboratory of Physico-Inorganic Chemistry, College of Chemistry & Materials Science, Northwest University, Xi'an 710127, P. R. China. E-mail: xglin707@163.com

<sup>c</sup> Xi'an Modern Chemistry Research Institute, Xi'an, 710065, P. R. China.

<sup>d</sup> Key Laboratory of Magnetic Molecules & Magnetic Information Materials (Ministry of Education), Institute of Chemistry and Culture, School of Chemistry & Material Science, Shanxi Normal University, Linfen 041004, P. R. China. E-mail: nwuligp@163.com

\*Corresponding author Email address: xglin707@163.com

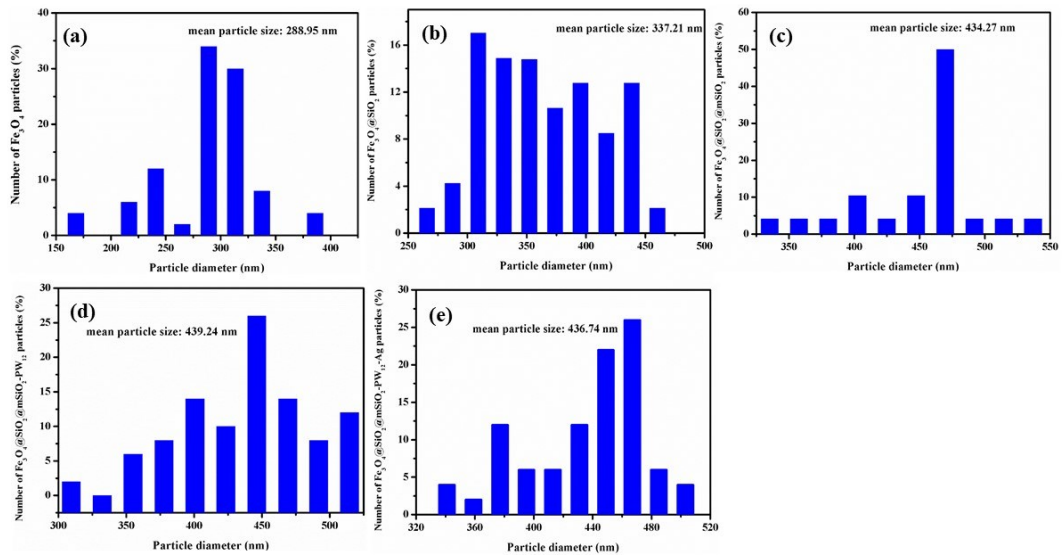

**Fig. S1** Size distribution of the as-prepared (a)  $\text{Fe}_3\text{O}_4$ ; (b)  $\text{Fe}_3\text{O}_4@\text{SiO}_2$ ; (c)  $\text{Fe}_3\text{O}_4@\text{SiO}_2@m\text{SiO}_2$ ; (d)  $\text{Fe}_3\text{O}_4@\text{SiO}_2@m\text{SiO}_2\text{-PW}_{12}$  and (e)  $\text{Fe}_3\text{O}_4@\text{SiO}_2@m\text{SiO}_2\text{-PW}_{12}/\text{Ag}$  samples.

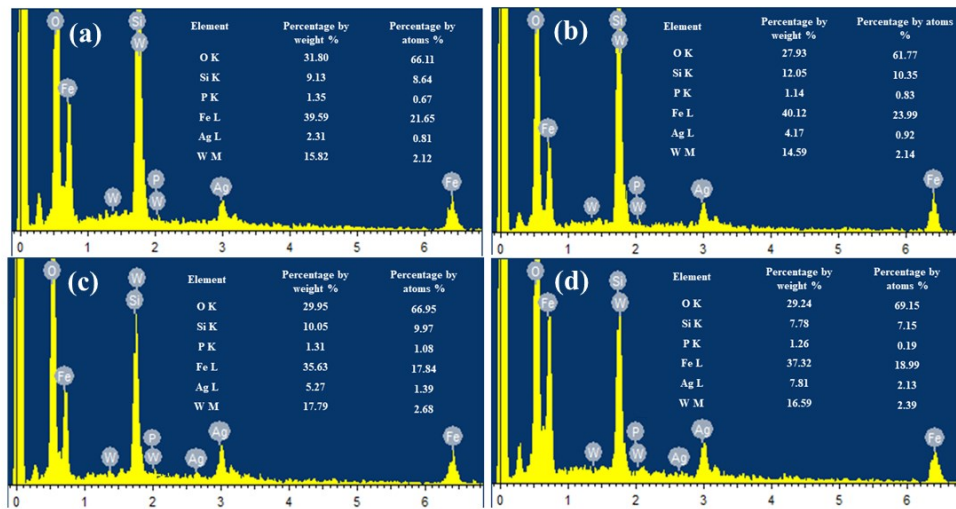

**Fig. S2** The EDX spectra of (a)  $\text{Fe}_3\text{O}_4@\text{SiO}_2@m\text{SiO}_2\text{-PW}_{12}/\text{Ag}_{1.2}$ ; (b)  $\text{Fe}_3\text{O}_4@\text{SiO}_2@m\text{SiO}_2\text{-PW}_{12}/\text{Ag}_{3.7}$ ; (c)  $\text{Fe}_3\text{O}_4@\text{SiO}_2@m\text{SiO}_2\text{-PW}_{12}/\text{Ag}_{5.3}$  and (d)  $\text{Fe}_3\text{O}_4@\text{SiO}_2@m\text{SiO}_2\text{-PW}_{12}/\text{Ag}_{6.4}$  samples, respectively.

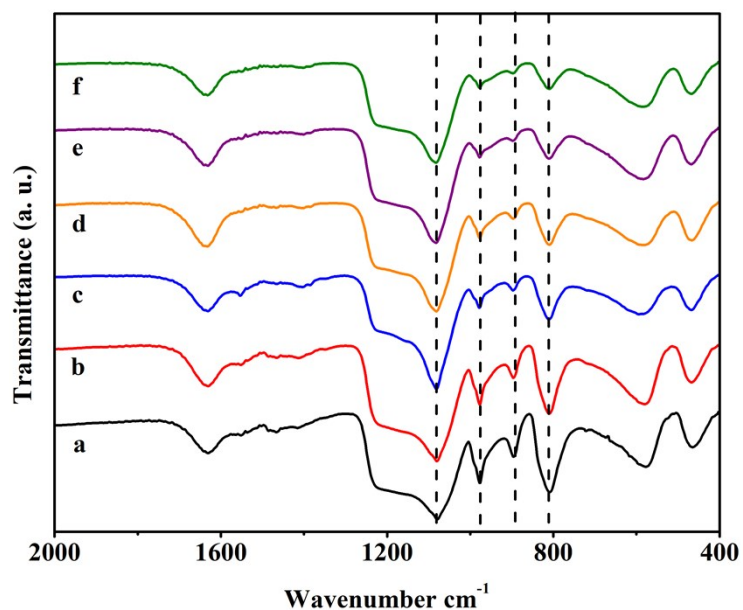

**Fig. S3** FT-IR spectra of  $\text{Fe}_3\text{O}_4@\text{SiO}_2@m\text{SiO}_2\text{-PW}_{12}$  with  $\text{PW}_{12}$  loadings of 3.57, 8.82, 14.52, 18.65, 20.01 and 20.36wt.%.

**Table S1** The BET surface area, average mesoporous size and total pore volume of as-synthesized composites.

| Samples                                                                     | $S_{\text{BET}}$<br>( $\text{m}^2\cdot\text{g}^{-1}$ ) | Average mesoporous<br>size (nm) | Total pore volume<br>( $\text{cm}^3\cdot\text{g}^{-1}$ ) |
|-----------------------------------------------------------------------------|--------------------------------------------------------|---------------------------------|----------------------------------------------------------|
| $\text{Fe}_3\text{O}_4@\text{SiO}_2@m\text{SiO}_2$                          | 273                                                    | 2.7                             | 0.21                                                     |
| $\text{Fe}_3\text{O}_4@\text{SiO}_2@m\text{SiO}_2\text{-PW}_{12}$           | 198                                                    | 2.3                             | 0.17                                                     |
| $\text{Fe}_3\text{O}_4@\text{SiO}_2@m\text{SiO}_2\text{-PW}_{12}/\text{Ag}$ | 172                                                    | 2.1                             | 0.15                                                     |

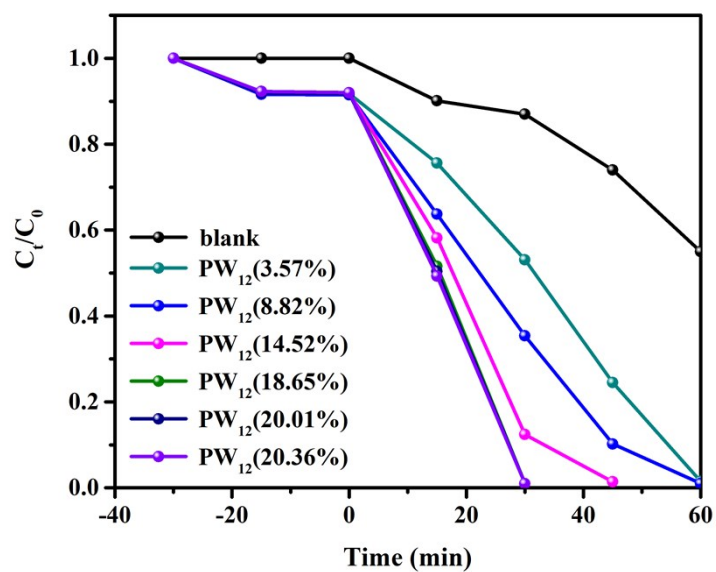

**Fig. S4** The profiles of photo-degradation of MO under ultraviolet light  $\text{Fe}_3\text{O}_4@SiO_2@mSiO_2\text{-PW}_{12}$

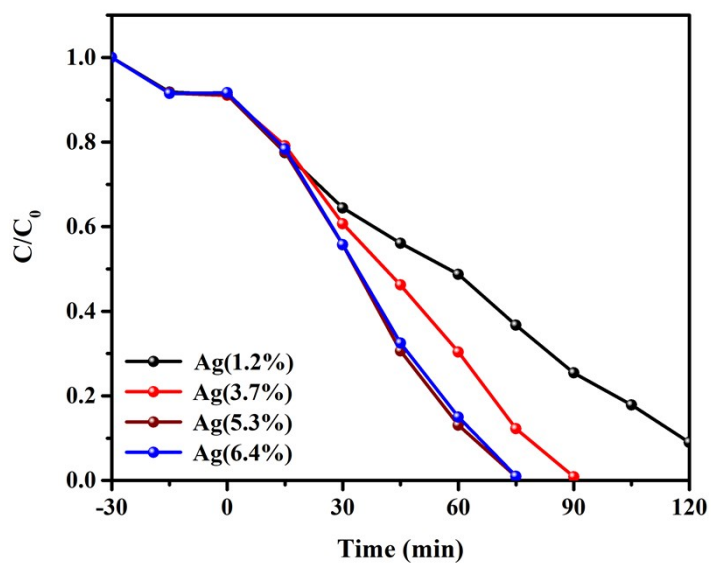

**Fig. S5** The profiles of photo-degradation of MO under simulated sun light upon  $\text{Fe}_3\text{O}_4@SiO_2@mSiO_2\text{-PW}_{12}/Ag$  with different Ag loadings.

**Table S2.** Lifetimes ( $\tau_1$  and  $\tau_2$ ) and relative intensities of different samples.

| Samples                                                                     | $\tau_1$ (ns) | $\tau_2$ (ns) | $A_1$ (%) | $A_2$ (%) | $\tau_{av}$ (ns) |
|-----------------------------------------------------------------------------|---------------|---------------|-----------|-----------|------------------|
| $\text{Fe}_3\text{O}_4@\text{SiO}_2@m\text{SiO}_2\text{-PW}_{12}$           | 1.0697        | 6.2174        | 72.59     | 27.41     | 0.4155           |
| $\text{Fe}_3\text{O}_4@\text{SiO}_2@m\text{SiO}_2\text{-PW}_{12}/\text{Ag}$ | 1.1353        | 5.5610        | 53.17     | 46.83     | 0.4802           |

Note: A two-exponential function equation is used to fit the decay time,  $\tau_{av} = (A_1 \cdot \tau_1^2 + A_2 \cdot \tau_2^2) / (A_1 \cdot \tau_1 + A_2 \cdot \tau_2)$ , where  $\tau$  and  $A$  are decay time and the relative magnitude of components, respectively. The average lifetime  $\tau_{av}$  is employed for comparison.

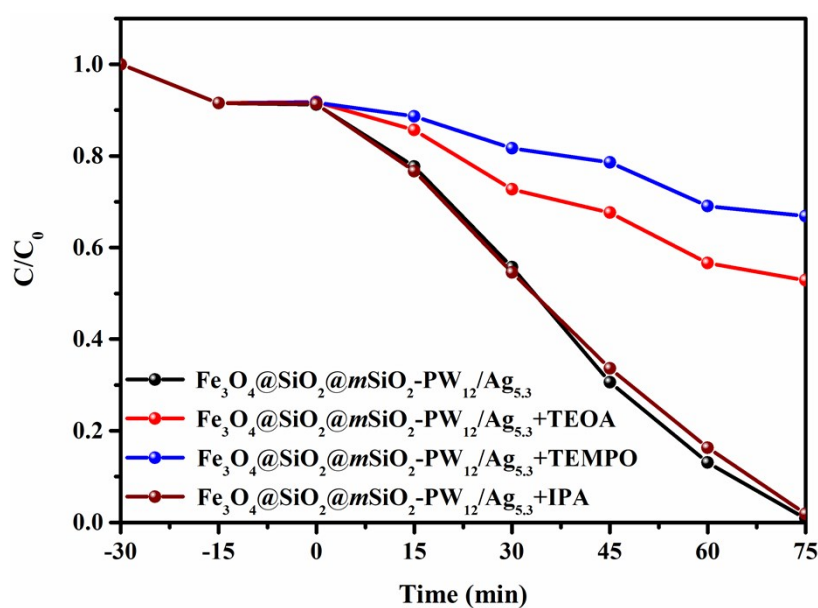

**Fig. S6** The effects of various scavengers photodegradation of MO for  $\text{Fe}_3\text{O}_4@\text{SiO}_2@m\text{SiO}_2\text{-PW}_{12}/\text{Ag}$  simulated sun light irradiation.
